Fig. S1

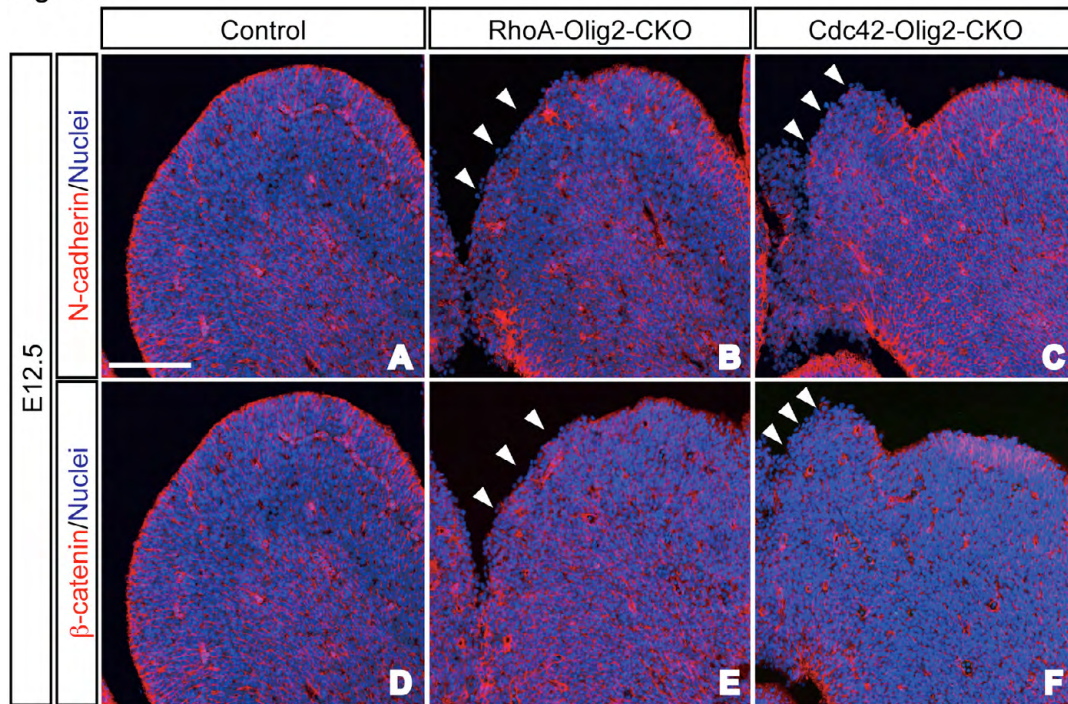

**Fig. S1. Disruption of adherens junctions in *RhoA*- and *Cdc42*-deleted neural progenitor cells.** (A-F) Apical localization of N-cadherin (A-C) and  $\beta$ -catenin (D-F) was lost in the dysplastic region of RhoA-Olig2-CKO and Cdc42-Olig2-CKO embryos at E12.5 (arrowheads). Scale bar: 100  $\mu$ m.

Fig. S2

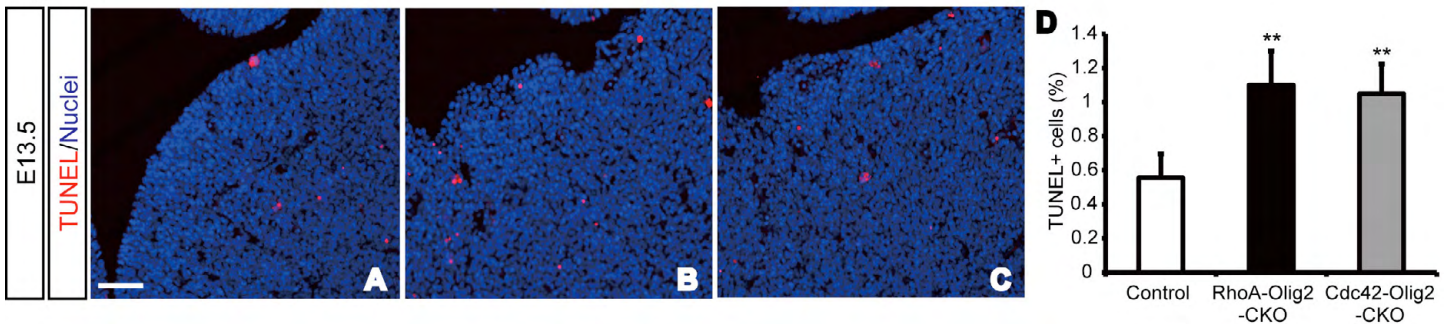

**Fig. S2. Loss of *RhoA* and *Cdc42* induced increased apoptosis in MGE cells.** (A-D) TUNEL staining revealed increased apoptosis in RhoA-Olig2-CKO and Cdc42-Olig2-CKO embryos. The graph represents the mean + s.d. of eight control (four *RhoA*<sup>fllox/+</sup>; *Olig2*-Cre and four *Cdc42*<sup>fllox/+</sup>; *Olig2*-Cre), three RhoA-Olig2-CKO and four Cdc42-Olig2-CKO embryos. Statistical analyses were carried out between *RhoA*<sup>fllox/+</sup>; *Olig2*-Cre and RhoA-Olig2-CKO embryos, and between *Cdc42*<sup>fllox/+</sup>; *Olig2*-Cre and Cdc42-Olig2-CKO embryos. \*\**P* < 0.01, Student's *t*-test. Scale bar: 50  $\mu$ m.

Fig. S3

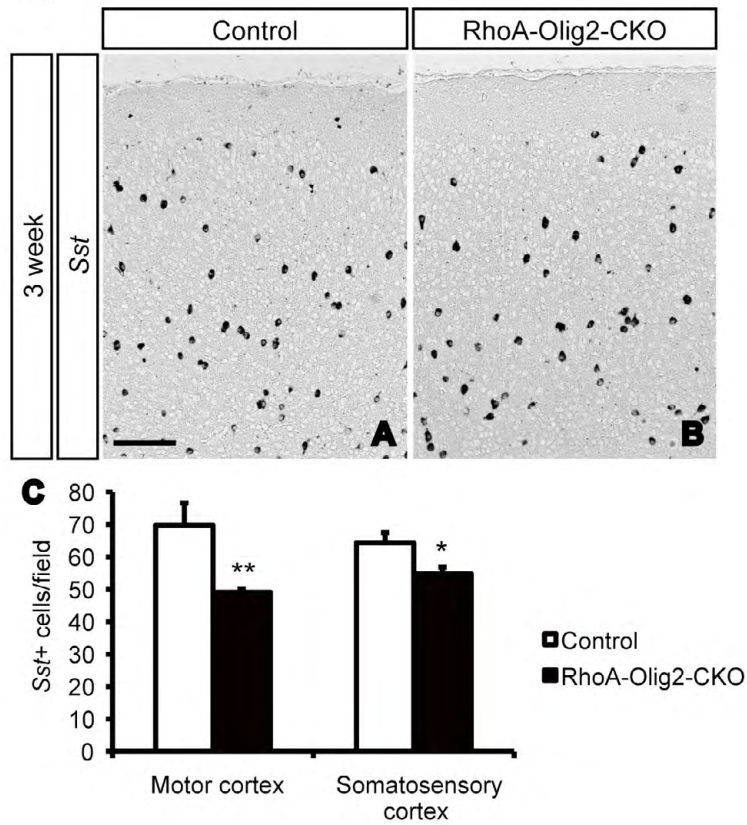

**Fig. S3. The number of *Sst*<sup>+</sup> cortical interneurons was decreased in RhoA-Olig2-CKO mice.** (A,B) *In situ* hybridization for *Sst* of the motor cortex at 3 weeks of age. (C) The number of *Sst*<sup>+</sup> cells was significantly decreased in the motor cortex as well as in the somatosensory cortex in RhoA-Olig2-CKO embryos compared with control embryos. *Sst*<sup>+</sup> cells in a 10× optical view were counted. The graph depicts the mean + s.d. of three mice. \**P*<0.05, \*\**P*<0.01, Student's *t*-test. Scale bar: 100 μm.

Fig. S4

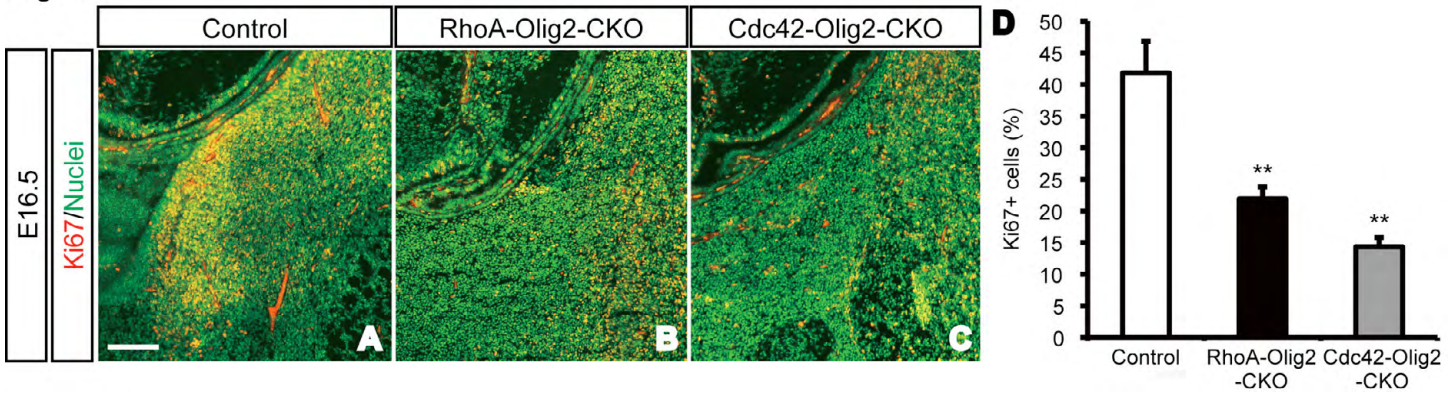

**Fig. S4. Reduced proliferating cells in the MGE in RhoA-Olig2-CKO and Cdc42-Olig2-CKO.** (A-C) The numbers of Ki67<sup>+</sup> proliferating cells were significantly decreased in the MGE of RhoA-Olig2-CKO and Cdc42-Olig2-CKO embryos at E16.5. (D) The graph represents the mean + s.d. of seven control (four *RhoA*<sup>flax/+</sup>; *Olig2*-Cre and three *Cdc42*<sup>flax/+</sup>; *Olig2*-Cre), four RhoA-Olig2-CKO and four Cdc42-Olig2-CKO embryos. Statistical analyses were carried out between *RhoA*<sup>flax/+</sup>; *Olig2*-Cre and RhoA-Olig2-CKO embryos, and *Cdc42*<sup>flax/+</sup>; *Olig2*-Cre and Cdc42-Olig2-CKO embryos. \*\**P*<0.01, Student's *t*-test. Scale bar: 100 μm.



Fig. S5

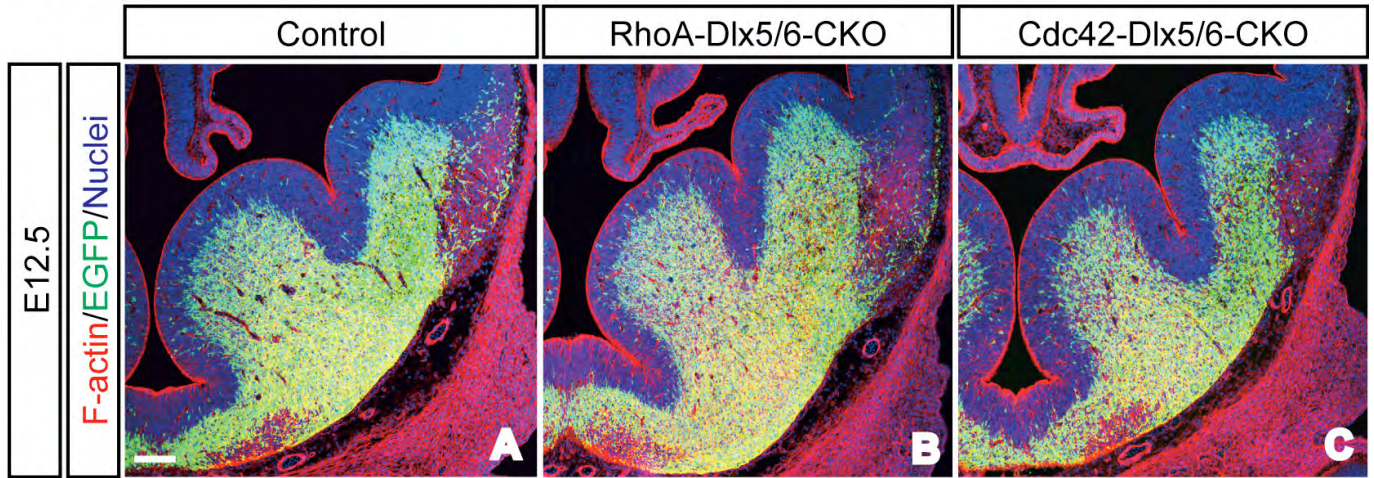

**Fig. S5. Apical organization was not disrupted in RhoA-Dlx5/6-CKO and Cdc42-Dlx5/6-CKO embryos.** (A-C) Apical localization of F-actin was present in the ganglionic eminences of RhoA-Dlx5/6-CKO and Cdc42-Dlx5/6-CKO embryos at E12.5. Scale bar: 100  $\mu$ m.
